# Supplementary material for: Effects of Controlled Mycorrhization and Deficit Irrigation in the Nursery on Post-Transplant Growth and Physiology of Acer campestre L. and Tilia cordata Mill.
Source: MDPI journal article supplement (doi:10.3390/f13050658), 2022-04-23
Supplement: s1 [file s1]

**Table S1.** Two-way ANOVA results for stomatal conductance ( $g_s$ ,  $\text{mmol m}^{-2} \text{s}^{-1}$ ),  $\text{CO}_2$  assimilation ( $A$ ,  $\mu\text{mol CO}_2 \text{m}^{-2} \text{s}^{-1}$ ), water use efficiency (WUE,  $\mu\text{mol CO}_2 \text{mmol}^{-1} \text{H}_2\text{O}$ ) and maximal quantum yield of PSII ( $F_v/F_m$ ) for *Acer campestre* and *Tilia cordata* 4, 5, 14, 16, 18, 27, 28, 30 months after transplant.

| Parameter | Months after transplant | <i>Acer campestre</i> |      |              | <i>Tilia cordata</i> |      |              |
|-----------|-------------------------|-----------------------|------|--------------|----------------------|------|--------------|
|           |                         | I                     | W    | I $\times$ W | I                    | W    | I $\times$ W |
| $g_s$     | 4                       | **                    | *    | n.s.         | n.s.                 | **   | n.s.         |
|           | 5                       | **                    | *    | n.s.         | n.s.                 | n.s. | n.s.         |
|           | 14                      | **                    | *    | n.s.         | n.s.                 | n.s. | n.s.         |
|           | 16                      | n.s.                  | n.s. | n.s.         | n.s.                 | n.s. | n.s.         |
|           | 18                      | n.s.                  | **   | n.s.         | n.s.                 | n.s. | n.s.         |
|           | 27                      | *                     | n.s. | n.s.         | n.s.                 | n.s. | n.s.         |
|           | 28                      | *                     | *    | n.s.         | *                    | n.s. | n.s.         |
|           | 30                      | n.s.                  | n.s. | n.s.         | n.s.                 | n.s. | n.s.         |
| A         | 4                       | **                    | *    | n.s.         | *                    | **   | n.s.         |
|           | 5                       | **                    | *    | n.s.         | n.s.                 | n.s. | n.s.         |
|           | 14                      | **                    | *    | n.s.         | n.s.                 | *    | n.s.         |
|           | 16                      | *                     | n.s. | n.s.         | n.s.                 | n.s. | n.s.         |
|           | 18                      | *                     | *    | n.s.         | n.s.                 | n.s. | n.s.         |
|           | 27                      | **                    | n.s. | n.s.         | n.s.                 | n.s. | n.s.         |
|           | 28                      | **                    | *    | n.s.         | **                   | n.s. | n.s.         |
|           | 30                      | n.s.                  | n.s. | n.s.         | *                    | n.s. | n.s.         |
| WUE       | 4                       | *                     | n.s. | n.s.         | n.s.                 | n.s. | n.s.         |
|           | 5                       | *                     | n.s. | n.s.         | *                    | n.s. | n.s.         |
|           | 14                      | n.s.                  | n.s. | n.s.         | n.s.                 | n.s. | n.s.         |
|           | 16                      | n.s.                  | n.s. | n.s.         | n.s.                 | n.s. | n.s.         |
|           | 18                      | *                     | n.s. | n.s.         | n.s.                 | n.s. | n.s.         |
|           | 27                      | n.s.                  | n.s. | n.s.         | n.s.                 | n.s. | n.s.         |
|           | 28                      | *                     | n.s. | n.s.         | **                   | n.s. | n.s.         |
|           | 30                      | n.s.                  | n.s. | n.s.         | *                    | *    | n.s.         |
| $F_v/F_m$ | 4                       | *                     | **   | n.s.         | **                   | *    | n.s.         |
|           | 5                       | *                     | *    | n.s.         | **                   | n.s. | n.s.         |
|           | 14                      | *                     | n.s. | n.s.         | **                   | n.s. | n.s.         |
|           | 16                      | n.s.                  | n.s. | n.s.         | n.s.                 | n.s. | n.s.         |
|           | 18                      | n.s.                  | n.s. | n.s.         | n.s.                 | n.s. | n.s.         |
|           | 27                      | n.s.                  | n.s. | n.s.         | **                   | n.s. | n.s.         |
|           | 28                      | n.s.                  | n.s. | n.s.         | n.s.                 | n.s. | n.s.         |
|           | 30                      | n.s.                  | n.s. | n.s.         | n.s.                 | n.s. | n.s.         |

I indicates inoculation factor, W indicates water regime factor, I  $\times$  W indicates interaction between inoculation and water regime.

\* Significant differences at  $p \leq 0.05$ . \*\* Significant differences at  $p \leq 0.01$ . n.s. = not significant differences.

**Table S2.** Two-way ANOVA results for sucrose, glucose, galactose, fructose, mannitol and total carbohydrates leaf content ( $\mu\text{mol g}^{-1}$  of dry weight) for *Acer campestre* and *Tilia cordata* 5, 14, 28 months after transplant.

| Parameter           | Months after transplant | <i>Acer campestre</i> |      |              | <i>Tilia cordata</i> |      |              |
|---------------------|-------------------------|-----------------------|------|--------------|----------------------|------|--------------|
|                     |                         | I                     | W    | I $\times$ W | I                    | W    | I $\times$ W |
| Sucrose             | 5                       | n.s.                  | **   | n.s.         | **                   | **   | n.s.         |
|                     | 14                      | **                    | n.s. | n.s.         | *                    | n.s. | n.s.         |
|                     | 28                      | n.s.                  | *    | n.s.         | n.s.                 | *    | n.s.         |
| Glucose             | 5                       | n.s.                  | **   | n.s.         | n.s.                 | *    | n.s.         |
|                     | 14                      | n.s.                  | *    | n.s.         | **                   | n.s. | n.s.         |
|                     | 28                      | n.s.                  | **   | n.s.         | n.s.                 | n.s. | n.s.         |
| Galactose           | 5                       | n.s.                  | n.s. | n.s.         | **                   | n.s. | n.s.         |
|                     | 14                      | n.s.                  | n.s. | n.s.         | **                   | n.s. | n.s.         |
|                     | 28                      | n.s.                  | n.s. | n.s.         | n.s.                 | n.s. | n.s.         |
| Fructose            | 5                       | n.s.                  | n.s. | n.s.         | n.s.                 | n.s. | n.s.         |
|                     | 14                      | *                     | n.s. | n.s.         | n.s.                 | n.s. | n.s.         |
|                     | 28                      | n.s.                  | n.s. | n.s.         | n.s.                 | n.s. | n.s.         |
| Mannitol            | 5                       | **                    | n.s. | n.s.         | *                    | n.s. | n.s.         |
|                     | 14                      | n.s.                  | n.s. | n.s.         | n.s.                 | n.s. | n.s.         |
|                     | 28                      | **                    | n.s. | n.s.         | n.s.                 | n.s. | n.s.         |
| Total carbohydrates | 5                       | n.s.                  | *    | n.s.         | **                   | n.s. | n.s.         |
|                     | 14                      | n.s.                  | n.s. | n.s.         | **                   | n.s. | n.s.         |
|                     | 28                      | n.s.                  | *    | n.s.         | n.s.                 | n.s. | n.s.         |

I indicates inoculation factor, W indicates water regime factor, I  $\times$  W indicates interaction between inoculation and water regime.

\* Significant differences at  $p \leq 0.05$ . \*\* Significant differences at  $p \leq 0.01$ . n.s. = not significant differences.
